# Supplementary material
Source: publisher figshare collection journal article supplement (https://tandf.figshare.com/articles/dataset/_/9884102)
Supplement: Supplementary file 1 [file 1]

Archive with 2 entries (2 files):
- Supplementary Table 1.pdf
- Supplementary Table 2.pdf
