# Supplementary material
Source: publisher figshare collection journal article supplement (https://tandf.figshare.com/articles/dataset/_/9884102)
Supplement: Supplementary file 1 [file 1 › Supplementary Table 1.pdf]

**Supplemental Table 1.** Changes (post- minus pre-treatment) in CMT and VA values of individual patients were correlated with changes (post- minus pre-treatment) in levels of different targets and values for visual parameters with correlation coefficients  $r > 0.5$ . Targets with  $p < 0.05$  are highlighted in bold.

| Changes in CMT Correlated with  |                                           |                                            |
|---------------------------------|-------------------------------------------|--------------------------------------------|
| Changes in <b>Target Levels</b> | Pearson Correlation Coefficient (p-value) | Spearman Correlation Coefficient (p-value) |
| sIL-6R                          | 0.541 (0.106)                             | 0.587 (0.073)                              |
| <b>TNF<math>\alpha</math></b>   | <b>0.528 (0.116)</b>                      | <b>0.709 (0.021)</b>                       |
| IL-10                           | -0.422 (0.223)                            | -0.575 (0.081)                             |
| VEGF-A                          | 0.521 (0.122)                             | 0.466 (0.060)                              |
| Changes in Vision Parameters    | Pearson Correlation Coefficient (p-value) | Spearman Correlation Coefficient (p-value) |
| <b>VA</b>                       | <b>-0.777 (0.008)</b>                     | <b>-0.747 (0.012)</b>                      |
| Changes in VA Correlated with   |                                           |                                            |
| Changes in <b>Target Levels</b> | Pearson Correlation Coefficient (p-value) | Spearman Correlation Coefficient (p-value) |
| IL-6                            | 0.551 (0.098)                             | 0.607 (0.062)                              |
| Changes in Vision Parameters    | Pearson Correlation Coefficient (p-value) | Spearman Correlation Coefficient (p-value) |
| <b>CMT</b>                      | <b>-0.777 (0.008)</b>                     | <b>-0.747 (0.012)</b>                      |
