# Supplementary material
Source: publisher figshare collection journal article supplement (https://tandf.figshare.com/articles/dataset/_/9884102)
Supplement: Supplementary file 1 [file 1 › Supplementary Table 2.pdf]

**Supplemental Table 2.** Changes (post- minus pre-treatment) in sIL-1R1 and sIL-1R2 levels of individual patients were correlated with changes (post- minus pre-treatment) in levels of different targets and values for visual parameters with correlation coefficients  $r > 0.5$ . Targets with  $p < 0.05$  are highlighted in bold.

| Changes in sIL-1R1 Correlated with |                                           |                                            |
|------------------------------------|-------------------------------------------|--------------------------------------------|
| Changes in <b>Target</b> Levels    | Pearson Correlation Coefficient (p-value) | Spearman Correlation Coefficient (p-value) |
| sIL-1R2                            | <b>0.733 (0.015)</b>                      | <b>0.551 (0.098)</b>                       |
| sRAGE                              | <b>0.698 (0.024)</b>                      | <b>0.539 (0.107)</b>                       |
| IL-17A                             | <b>0.669 (0.034)</b>                      | <b>0.563 (0.089)</b>                       |
| IL-18                              | 0.567 (0.087)                             | 0.515 (0.127)                              |
| VEGF-D                             | -0.572 (0.083)                            | -0.539 (0.107)                             |
| Changes in Vision Parameters       | Pearson Correlation Coefficient (p-value) | Spearman Correlation Coefficient (p-value) |
| CMT                                | 0.236 (0.511)                             | 0.054 (0.881)                              |
| VA                                 | -0.178 (0.622)                            | -0.139 (0.700)                             |
| Changes in sIL-1R2 Correlated with |                                           |                                            |
| Changes in <b>Target</b> Levels    | Pearson Correlation Coefficient (p-value) | Spearman Correlation Coefficient (p-value) |
| sIL-1R1                            | <b>0.733 (0.015)</b>                      | <b>0.551 (0.098)</b>                       |
| IL-17A                             | <b>0.733 (0.015)</b>                      | <b>0.781 (0.007)</b>                       |
| VEGF-D                             | <b>-0.722 (0.018)</b>                     | <b>-0.636 (0.047)</b>                      |
| Changes in Vision Parameters       | Pearson Correlation Coefficient (p-value) | Spearman Correlation Coefficient (p-value) |
| CMT                                | 0.191 (0.595)                             | 0.224 (0.533)                              |
| VA                                 | 0.078 (0.829)                             | 0.194 (0.590)                              |
